# Supplementary material
Source: publisher site journal article supplement (https://www.dovepress.com/article/242763)
Supplement: Supplementary file 1 [file get_supplementary_file.php]

## Supplementary materials

LoVo cell lines

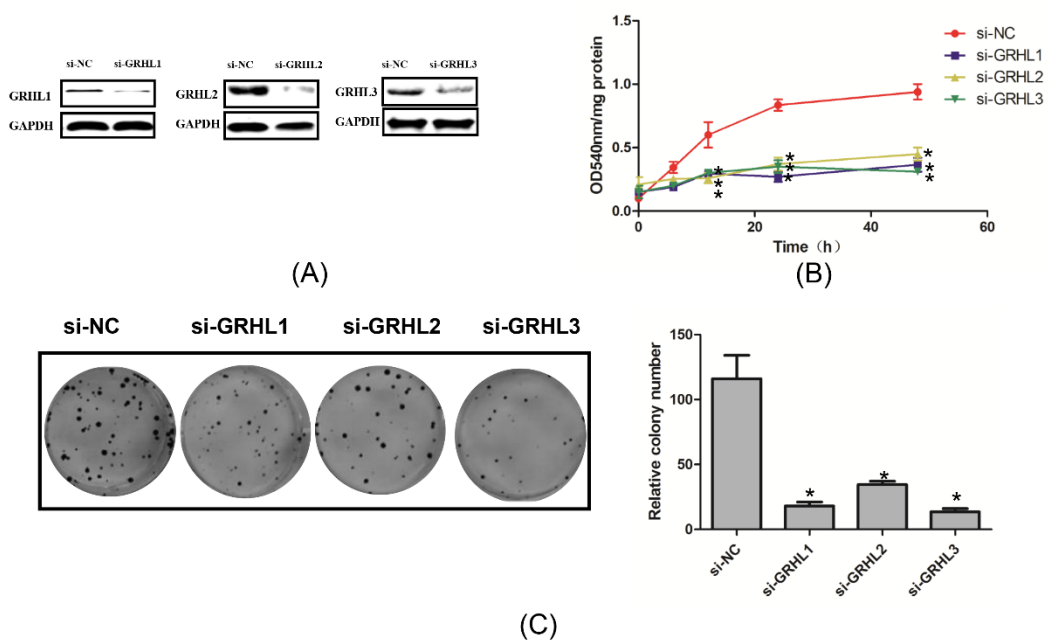

**Supplementary materials** Knockdown of GRHL genes reduces proliferation of human LoVo CC cells. \*P < 0.05 vs siNC group. (A) The representative western blot images in indicated groups. (B) The OD540 of different groups at different time points using CCK8 assay. (C) Colony formation images in indicated groups.

P < 0.05 versus the si-NC group.
